# Supplementary material
Source: PubMed Central journal article supplement (PMC5568473)
Supplement: NIHMS885960-supplement-2.pdf [file NIHMS885960-supplement-2.pdf]

**Supplementary Table 1**

| Cathepsin gene | Blimp-1 binding site<br>(relative to +1 TSS) | Blimp-1 binding sequence                   | Expression in Blimp-1<br>deficient DCs (qPCR) |
|----------------|----------------------------------------------|--------------------------------------------|-----------------------------------------------|
| <i>Ctsa</i>    | N.D                                          |                                            | No change                                     |
| <i>Ctsb</i>    | N.D                                          |                                            | No change                                     |
| <i>Ctsc</i>    | -1175, -1201                                 | 5'-GAAAG-3', 5'-GAAAG-3'                   | No change                                     |
| <i>Ctsd</i>    | -874                                         | 5'-GTGAAAG-3'                              | No change                                     |
| <i>Ctse</i>    | -68, -196                                    | 5'-GAAAGT-3', 5'-GAAAG-3'                  | No change                                     |
| <i>Ctsl</i>    | -1235, -836, -127                            | 5'-GAAAG-3', 5'-GAAAG-3',<br>5'-GAAAG-3'   | <i>Increased</i>                              |
| <i>Ctsl2</i>   | N.D                                          |                                            | No change                                     |
| <i>Ctsg</i>    | -731, -574, -5                               | 5'-GAAAGTA-3', 5'-GAAAG-3',<br>5'-GAAAG-3' | No change                                     |
| <i>Ctss</i>    | +1                                           | 5'-GAAAGT-3'                               | <i>Increased</i>                              |
